# Supplementary material
Source: PubMed Central journal article supplement (PMC7971174)
Supplement: NIHMS1549212-supplement-40883_2019_140_MOESM3_ESM.pdf [file NIHMS1549212-supplement-40883_2019_140_MOESM3_ESM.pdf]

| Gene       | Forward Primer 5' - 3'  | Reverse primer 5' - 3'   | size  | Contig from SalSite |
|------------|-------------------------|--------------------------|-------|---------------------|
| Ext1       | CTCATGAACTTCCTGGTGTCTG  | AATGTGTTTCATGCAGGTCTGTC  | 158bp | contig322210        |
| Ext2       | TGAGATTGAGACCGAGTCTGTG  | TGTTTCATTTTCATGATCCCAGAG | 155bp | contig201756        |
| Extl3      | TCAGCCAAACAGAGCATTCTTA  | CAGATGTAAGGGAACAACGTGA   | 174bp | contig316108        |
| HsGlce     | ACGTCTTCCTCAATTCTGCACT  | AGCTTCTCACCTGCAGTCTCTT   | 199bp | contig369194        |
| NDST1      | CCTCAGCGTCTTTGTCTCCGCA  | AGGGGTCCGTGCGGGATGAATC   | 164bp | contig317260        |
| NDST2      | AAGGGAATTGACTGGTACATGG  | TCTGCAGGATTTATCACAAATGG  | 167bp | contig315948        |
| NDST3      | GATCGGTACATGCTTGTGGATA  | GTCGTCACCTTCATCCTCTTTC   | 195bp | FSIRIH301BR2YG      |
| NDST4      | GTACCTCTTCCTCCTGATGCAC  | GAAAGTCACTGGTTGCATTTGA   | 158bp | contig771542        |
| HS2ST1     | TTGTTTGAAGATGAGGATGTGG  | ACGTTCTTCACAAATCGAACCT   | 182bp | contig188687        |
| HS3ST1     | AGGCAATAAACCGGAGTCTGTA  | GAGGCATTGATCTGTGGTGATA   | 166bp | contig213789        |
| HS3ST2     | TGACAGCCAGATCACCATAGAG  | CTTGAGAGCGTCTGGGTATAG    | 157bp | contig418192        |
| HS3ST3B1   | GGAGTAGCAAGCCACACTGTCT  | TCTCAATCCCAGCCAAAGTT     | 151bp | contig368768        |
| HS3ST4     | GGCTTGATAGACACATCATGGA  | GTTTGTCCGTAATGACCCTCTT   | 190bp | FUMMWP202GWUOE      |
| HS3ST6     | CGTGACTAGAGCCATCTCAGAC  | GTTGGAGAGTGGGAAGTACTGG   | 184bp | contig348838        |
| HS6ST1     | GCTACAACATGTCGTTTATTCC  | CACGGGTGTTATTGTACTGCAT   | 186bp | contig316260        |
| Sulf1      | CATGGACAAGCACTGGATTATG  | CGTGGTCAGCTGTGTAGATGAT   | 191bp | contig100849        |
| Sulf2      | TCTATGTTTCGAGGGCCTAATGT | GAAATCTGTTGACGGGTCTTTC   | 171bp | contig122558        |
| GPC1       | GCGACGAAAGTCTAACATGGA   | CCAACATTTGTCTTCGTTTCGT   | 169bp | contig155768        |
| GPC3       | TGTAGCATCCCAAACAGAGG    | AGAGGTGTGCTTGCAGATGTT    | 198bp | contig61175         |
| GPC4       | GGAGACCTAGAAACCGACTGG   | GTCCACATCCTTGGAACCT      | 184bp | contig201787        |
| GPC5       | AGGTCAGAGGACCAGACCTTC   | TGGACTCCACGTCGTCTTTAC    | 198bp | contig189513        |
| GPC6       | AACAATCCAGAAGTGGACGTG   | AACTCTGTGGGGCAGATGTC     | 197bp | contig807962        |
| SDC1       | CAGAAACCACGGAAGAGACTG   | GAGGCAGATGGCAAACAGTAG    | 188bp | contig34331         |
| SDC2       | TGACGATTATTCAGGGTCTGG   | TTCGTCAGGTACCTTGGTCTG    | 178bp | contig207180        |
| SDC3       | GTTTTGATAGCGGTGATCGTC   | AAACTCCTCCTGCtTTTCAGG    | 168bp | contig122303        |
| SDC4       | GGAGTTTGTGTTGAAGACGA    | TCTCTGGGACAACCTTCATTGC   | 194bp | contig202279        |
| Serglycin  | GATGCTGCTTCTGCTAACTGC   | AGCAACATCAACACCAGATCC    | 177bp | contig344051        |
| Agtrin     | TGTTCTACACTCCCGAAATGG   | AAGTGAGCCTCGACAATAGCA    | 181bp | contig113308        |
| Collagen18 | AATGACCTTGCAAGTGGAAACAG | CTGATTCTGGTTGTCGGTGAT    | 157bp | contig356144        |
