# Supplementary material
Source: PubMed Central journal article supplement (PMC7971174)
Supplement: NIHMS1549212-supplement-40883_2019_140_MOESM4_ESM.pdf [file NIHMS1549212-supplement-40883_2019_140_MOESM4_ESM.pdf]

**Table 1.** Expression of sulfation-related genes in axolotl limb blastemas and other tissues

| Gene       | EB  | MB  | LB  | Pal | ED  | skin | brain | heart | kidney | liver | lung | spleen | testis |
|------------|-----|-----|-----|-----|-----|------|-------|-------|--------|-------|------|--------|--------|
| Ext1       | ++  | ++  | ++  | ++  | ++  | ++   | ++    | ++    | ++     | ++    | ++   | ++     | ++     |
| Ext2       | ++  | ++  | ++  | ++  | ++  | -    | ++    | ++    | ++     | +     | ++   | ++     | +      |
| Ext3       | ++  | ++  | ++  | ++  | ++  | +    | ++    | ++    | ++     | +     | ++   | ++     | +      |
| HsGlce     | ++  | ++  | ++  | ++  | ++  | +    | +++   | ++    | +++    | ++    | ++   | ++     | ++     |
| NDST1      | +++ | +++ | +++ | +++ | +++ | +    | ++    | ++    | ++     | ++    | +    | +      | ++     |
| NDST2      | ++  | ++  | ++  | ++  | ++  | -    | ++    | +     | ++     | +     | +    | +      | ++     |
| NDST3      | -   | -   | -   | -   | -   | -    | +     | -     | -      | -     | -    | -      | -      |
| NDST4      | -   | -   | -   | -   | -   | -    | +     | -     | -      | -     | -    | -      | -      |
| HS2ST1     | ++  | ++  | ++  | ++  | ++  | +    | ++    | ++    | ++     | ++    | ++   | ++     | ++     |
| HS3ST1     | ++  | ++  | ++  | ++  | ++  | +    | ++    | ++    | ++     | ++    | ++   | -      | -      |
| HS3ST2     | -   | -   | -   | -   | -   | +    | ++    | ++    | ++     | +     | +    | -      | ++     |
| HS3ST3B1   | ++  | ++  | ++  | ++  | ++  | +    | ++    | ++    | ++     | +     | +    | -      | -      |
| HS3ST4     | ++  | ++  | ++  | ++  | ++  | +    | ++    | +     | ++     | +     | -    | -      | ++     |
| HS3ST6     | ++  | ++  | ++  | ++  | ++  | +    | ++    | ++    | ++     | ++    | +    | +      | ++     |
| HS6ST1     | ++  | ++  | ++  | ++  | ++  | +    | ++    | ++    | ++     | +     | +    | ++     | +      |
| Sulf1      | ++  | ++  | ++  | ++  | ++  | -    | ++    | ++    | ++     | -     | ++   | ++     | ++     |
| Sulf2      | +   | +   | +   | +   | +   | -    | ++    | ++    | ++     | -     | ++   | ++     | ++     |
| GPC1       | ++  | ++  | ++  | ++  | ++  | +    | +     | -     | +      | -     | -    | -      | +      |
| GPC3       | -   | -   | -   | -   | -   | -    | +     | -     | -      | -     | -    | -      | -      |
| GPC4       | ++  | ++  | ++  | ++  | ++  | -    | ++    | ++    | ++     | +     | ++   | ++     | ++     |
| GPC5       | ++  | ++  | ++  | ++  | ++  | -    | +     | -     | -      | -     | -    | +      | +      |
| GPC6       | -   | -   | -   | +   | ++  | -    | +     | -     | -      | -     | -    | -      | +      |
| SDC1       | ++  | ++  | ++  | ++  | ++  | ++   | +     | -     | ++     | +     | +    | -      | +      |
| SDC2       | ++  | ++  | ++  | ++  | ++  | ++   | ++    | ++    | ++     | ++    | ++   | ++     | ++     |
| SDC3       | ++  | ++  | ++  | ++  | ++  | -    | ++    | +     | ++     | ++    | -    | -      | ++     |
| SDC4       | ++  | ++  | ++  | ++  | ++  | +    | +     | +     | ++     | +     | +    | +      | ++     |
| Serglycin  | +++ | +++ | +++ | +++ | +++ | ++   | +++   | +++   | +++    | +++   | +++  | +++    | ++     |
| Agtrin     | ++  | ++  | ++  | ++  | ++  | -    | ++    | -     | ++     | +     | -    | -      | ++     |
| Collagen18 | +++ | +++ | +++ | +++ | +++ | +    | +++   | +++   | +++    | ++    | ++   | ++     | +++    |

Compared to Phan ECM paper

NDST1 – she saw expression in both blastema and skin - same for us

\*NDST2 – she saw expression in both blastema and skin – we do not detect expression in skin

NDST3 – she did not see expression in skin or blastema – same for us – only see expression (low) in brain

NDST4 – she did not see expression in skin or blastema – same as for NDST3 – brain only

HS6ST1 – she saw expression in both blastema and skin – same for us

HS2ST1 – she saw expression in both blastema and skin – same for us

\*HS3ST1 – she saw expression in blastema but not skin - we saw expression in both but much lower in the skin (consistent)

HS3ST2 – she saw expression in the skin but not the blastema – same for us

\*HS3ST3B1 – she saw expression in the blastema but not the skin – we saw very low level in the skin – but is expressed in the blastema (pretty much the same)

\*HS3ST4 – she did not see expression in either skin or blastema – we saw expression in both blastema and very low in the skin
