# Supplementary material
Source: PubMed Central journal article supplement (PMC7971174)

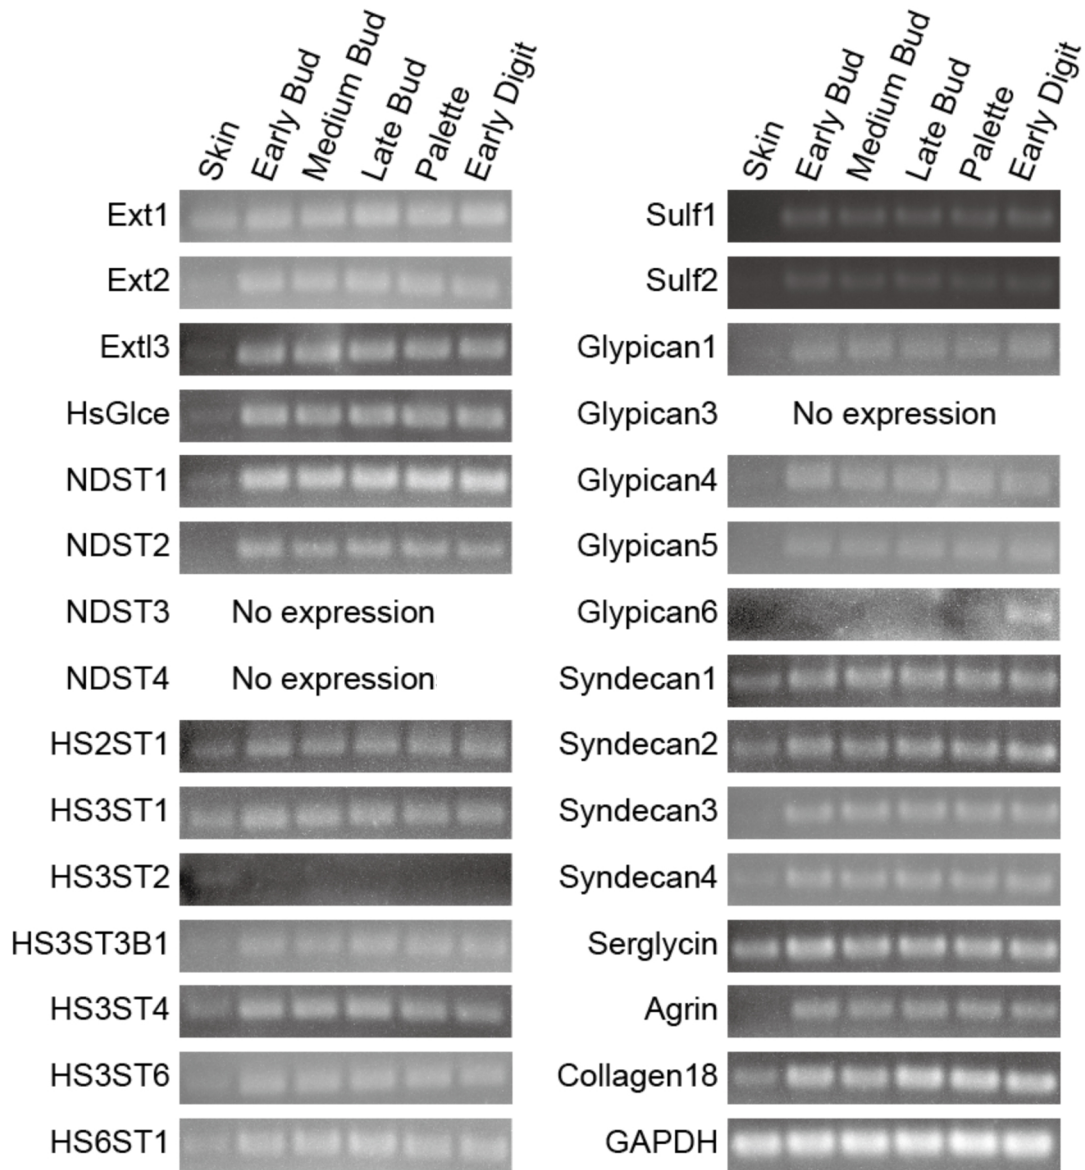

Otsuka Supplemental Figure 1

Supplement: NIHMS1549212-supplement-40883_2019_140_MOESM1_ESM.pdf [file NIHMS1549212-supplement-40883_2019_140_MOESM1_ESM.pdf]

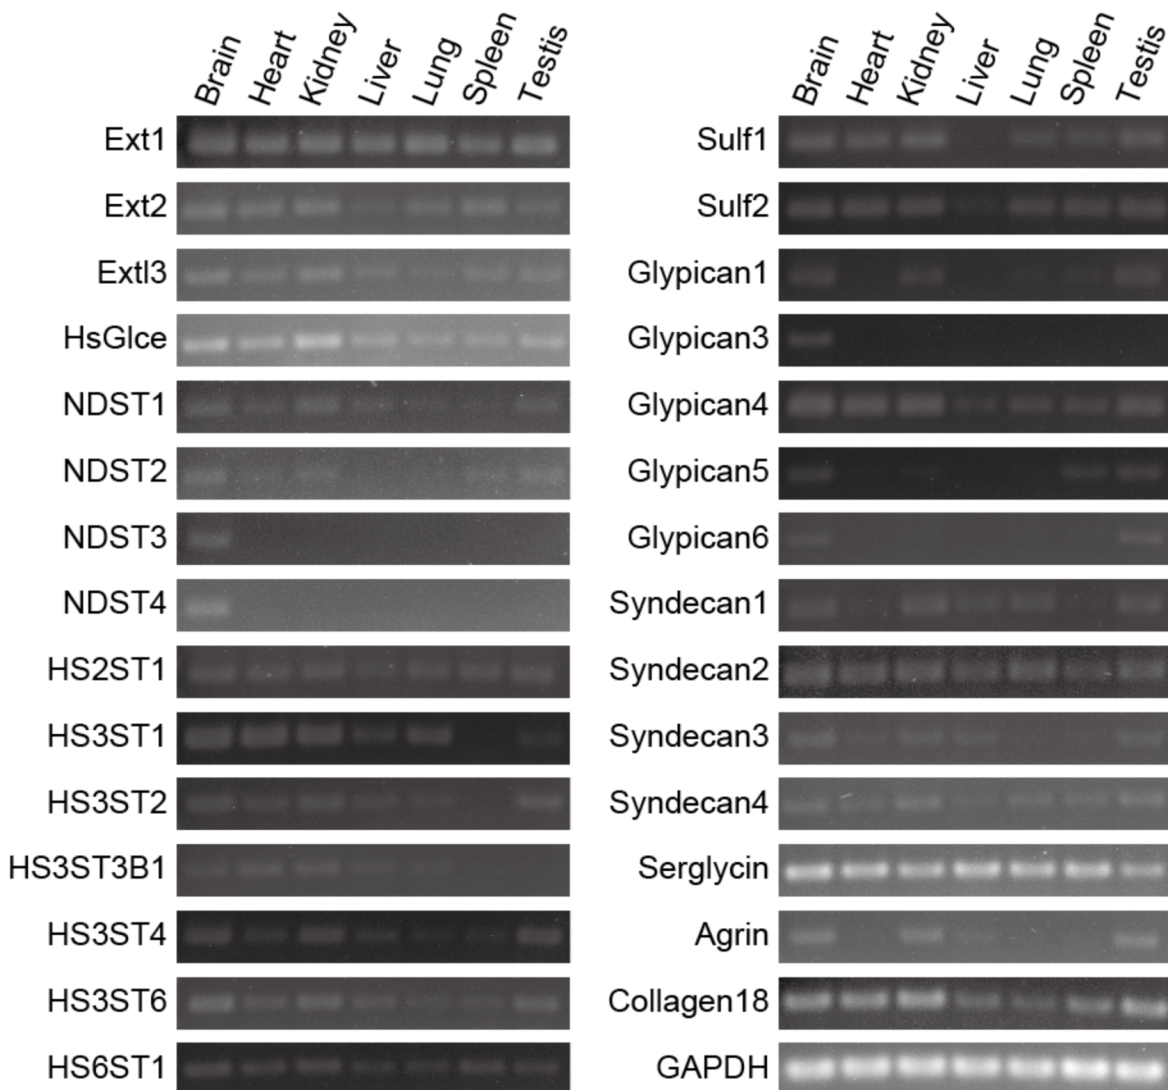

Otsuka Supplemental Figure 2

Supplement: NIHMS1549212-supplement-40883_2019_140_MOESM2_ESM.pdf [file NIHMS1549212-supplement-40883_2019_140_MOESM2_ESM.pdf]
